# Supplementary material for: Incorporation of Coumarin-Based Fluorescent Monomers into Co-Oligomeric Molecules
Source: PubMed Central journal article supplement (PMC6415208; doi:10.3390/polym10040396), 2018-04-03
Supplement: polymers-10-00396-s001.pdf [file polymers-10-00396-s001.pdf]

## Supporting Information

# INCORPORATION OF COUMARIN-BASED FLUORESCENT MONOMERS INTO CO-OLIGOMERIC MOLECULES

Edgar Teixeira,<sup>1</sup> João C. Lima,<sup>1</sup> A. Jorge Parola<sup>1,\*</sup> and Paula S. Branco<sup>1,\*</sup>

<sup>1</sup> LAQV-REQUIMTE, Departamento de Química, Faculdade de Ciências e Tecnologia, Universidade NOVA de Lisboa, 2829-516 Caparica, Portugal

\* Correspondence: [ajp@fct.unl.pt](mailto:ajp@fct.unl.pt); [paula.branco@fct.unl.pt](mailto:paula.branco@fct.unl.pt); Tel.: +351-212948300

### Contents

|                                                                                                                     |     |
|---------------------------------------------------------------------------------------------------------------------|-----|
| <sup>1</sup> H, <sup>13</sup> C NMR spectra, FTIR and Mass spectrum of 7-Hydroxy-3-vinylcoumarin ( <b>3</b> ) ..... | S2  |
| <sup>1</sup> H, <sup>13</sup> C NMR spectra, FTIR and Mass spectrum of the co-oligomers .....                       | S4  |
| Co-oligomer of styrene with 3-vinylcoumarin ( <b>1b</b> ) .....                                                     | S4  |
| Co-oligomer of styrene with 7-methoxy-3-vinylcoumarin ( <b>2b</b> ) .....                                           | S6  |
| Co-oligomer of methyl acrylate with 7-methoxy-3-vinylcoumarin ( <b>2a</b> ) .....                                   | S8  |
| Co-oligomer of methyl acrylate with 7-hydroxy-3-vinylcoumarin ( <b>3a</b> ) .....                                   | S10 |
| Co-oligomer of methyl acrylate with 3-vinylcoumarin ( <b>1a</b> ) .....                                             | S12 |

# $^1\text{H}$ , $^{13}\text{C}$ NMR spectra, FTIR and Mass spectrum of 7-Hydroxy-3-vinylcoumarin (3)

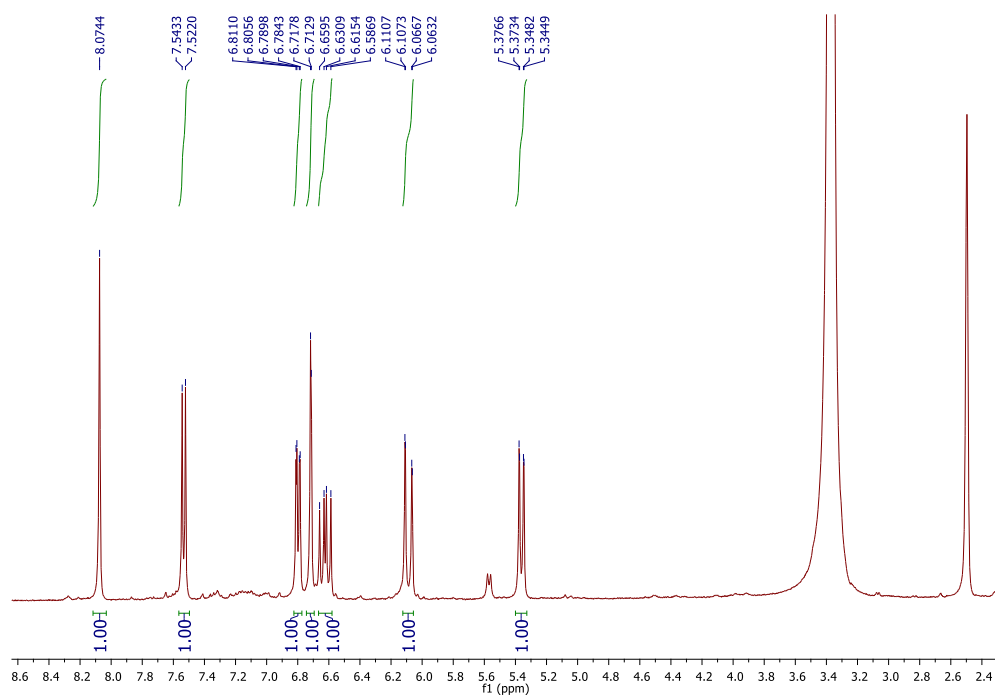

**Figure S1** -  $^1\text{H}$  (400 MHz, DMSO) of 7-hydroxy-3-vinylcoumarin (3).

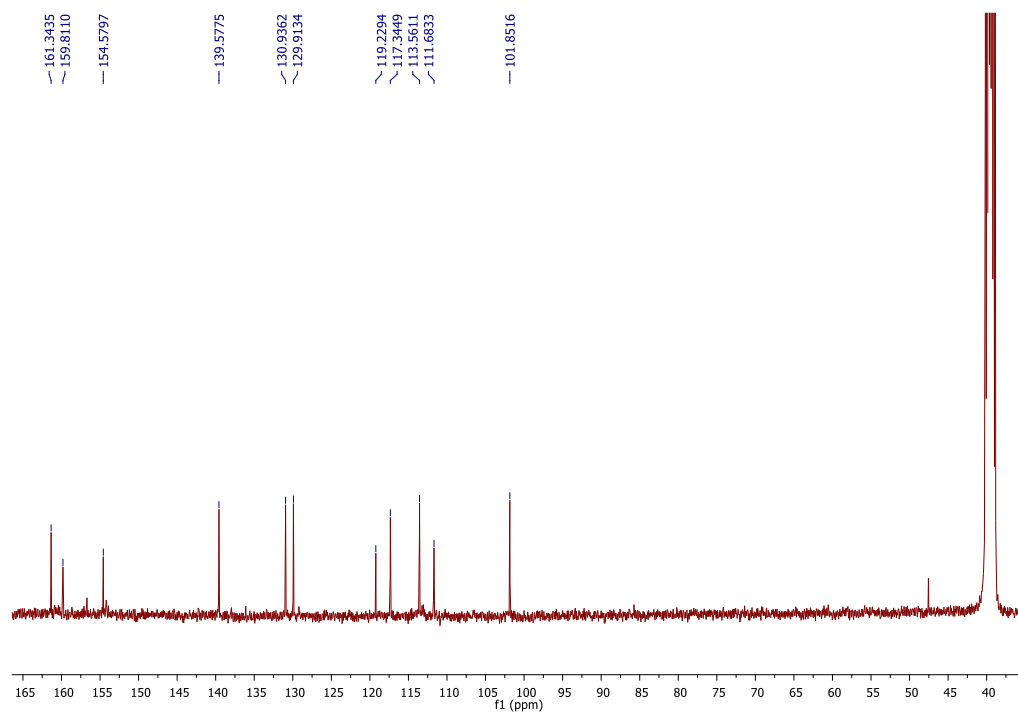

**Figure S2** -  $^{13}\text{C}$  (100 MHz, DMSO) of 7-hydroxy-3-vinylcoumarin (3).

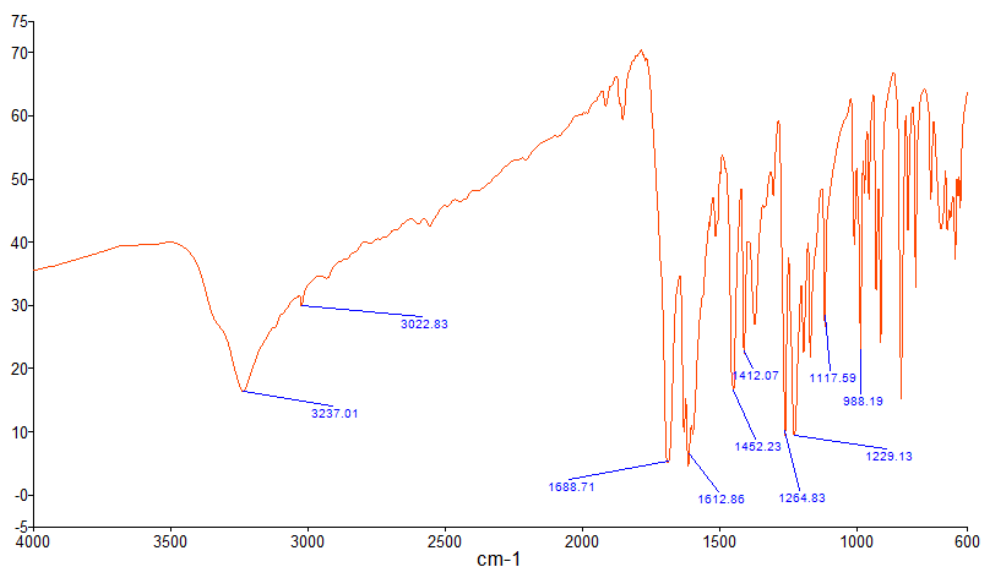

**Figure S3** - FTIR (KBr) of compound 7-hydroxy-3-vinylcoumarin (**3**).

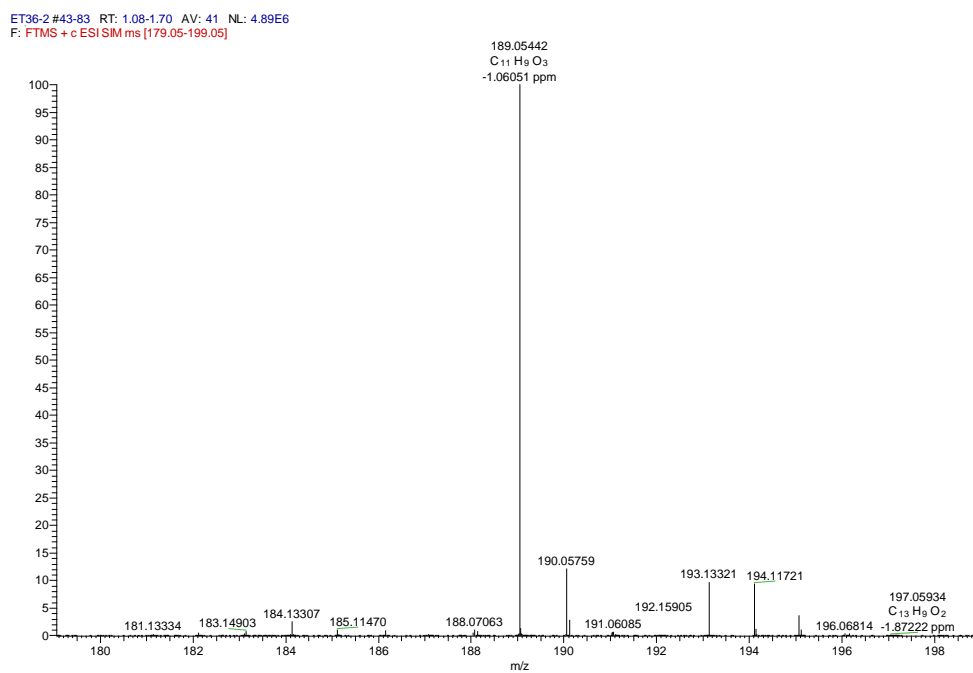

**Figure S4** - HRMS-ESI (+) of 7-hydroxy-3-vinylcoumarin (**3**).

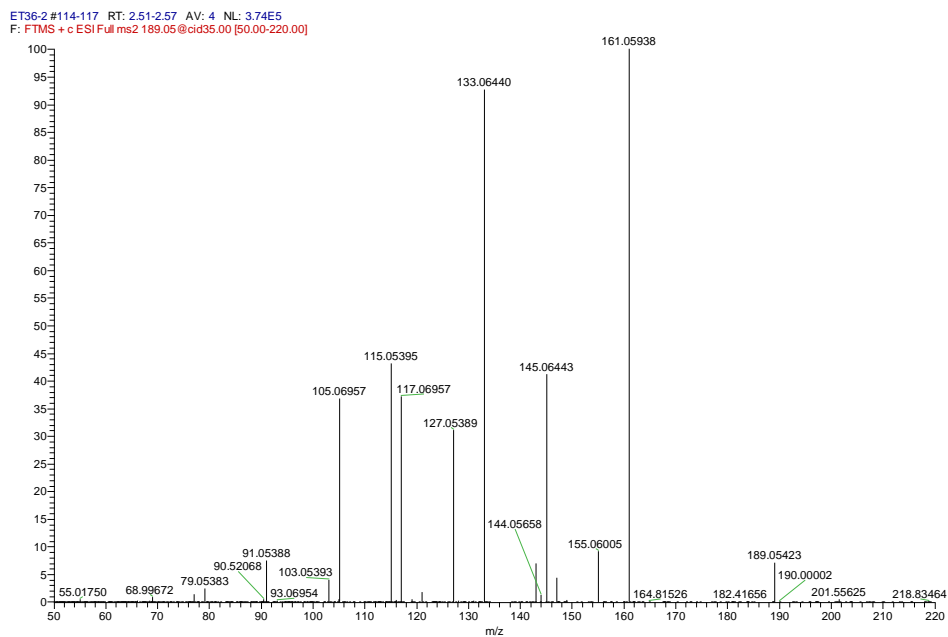

**Figure S5** - ESI-MS/MS (189) spectrum of 7-hydroxy-3-vinylcoumarin (**3**).

## $^1\text{H}$ , $^{13}\text{C}$ NMR spectra, FTIR and Mass spectrum of the co-oligomers

### Co-oligomer of styrene with 3-vinylcoumarin (**1b**)

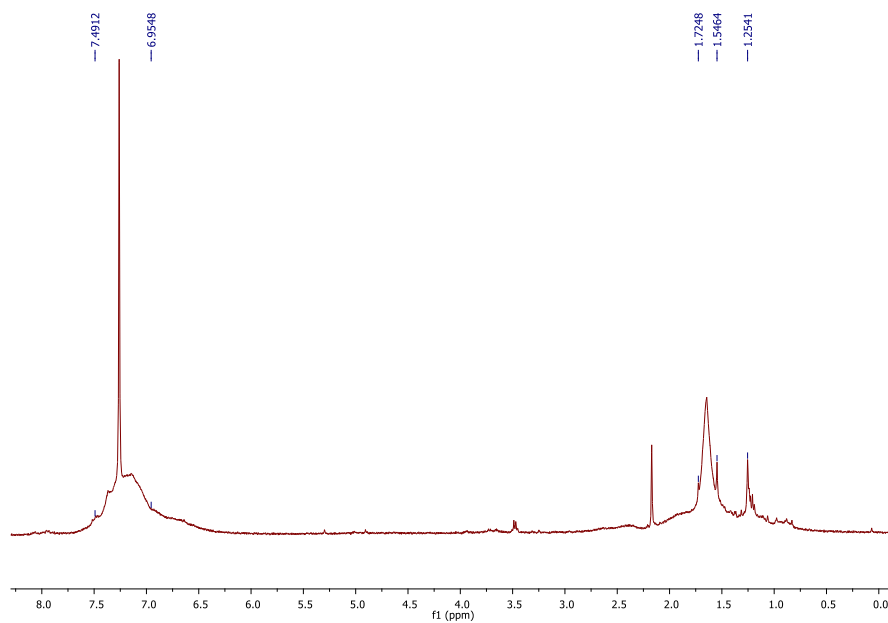

**Figure S6** -  $^1\text{H}$  (400 MHz,  $\text{CDCl}_3$ ) of co-oligomer **1b**.

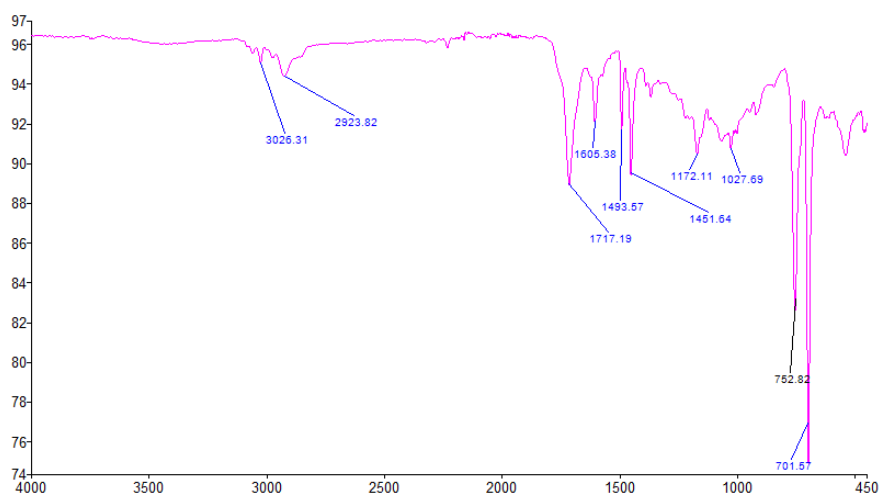

**Figure S7** - FTIR (KBr) of co-oligomer **1b**.

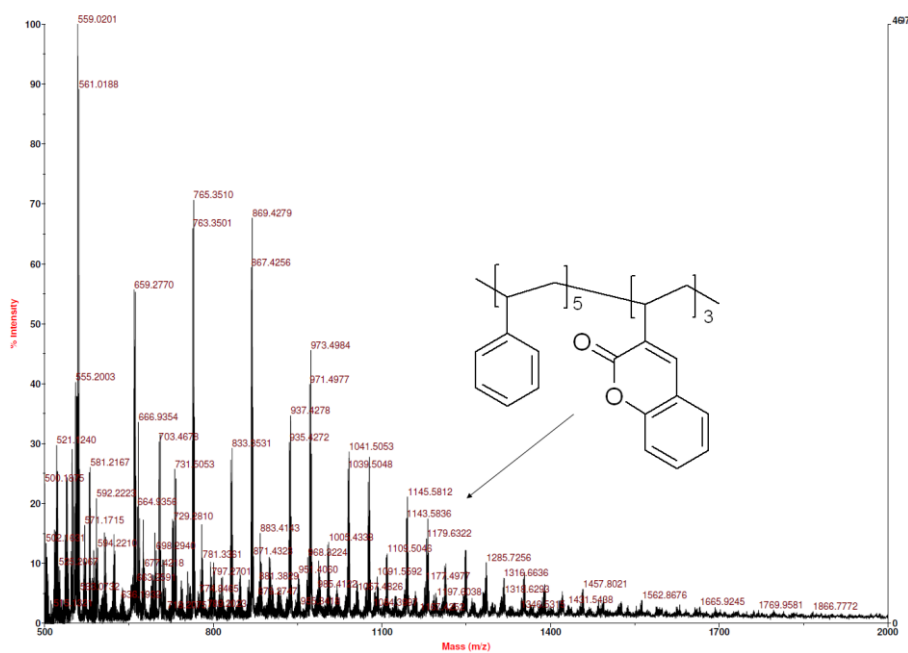

**Figure S8** - MALDI-TOF Mass spectrum (matrix - dithranol + Ag) of co-oligomer **1b**. Assigned in the spectrum is the ion with  $m/z$  1143 which can be attributed to five molecules of styrene, three of coumarin **1**, a terminal isobutyronitrile and a potassium ion.

## Co-oligomer of styrene with 7-methoxy-3-vinylcoumarin (2b)

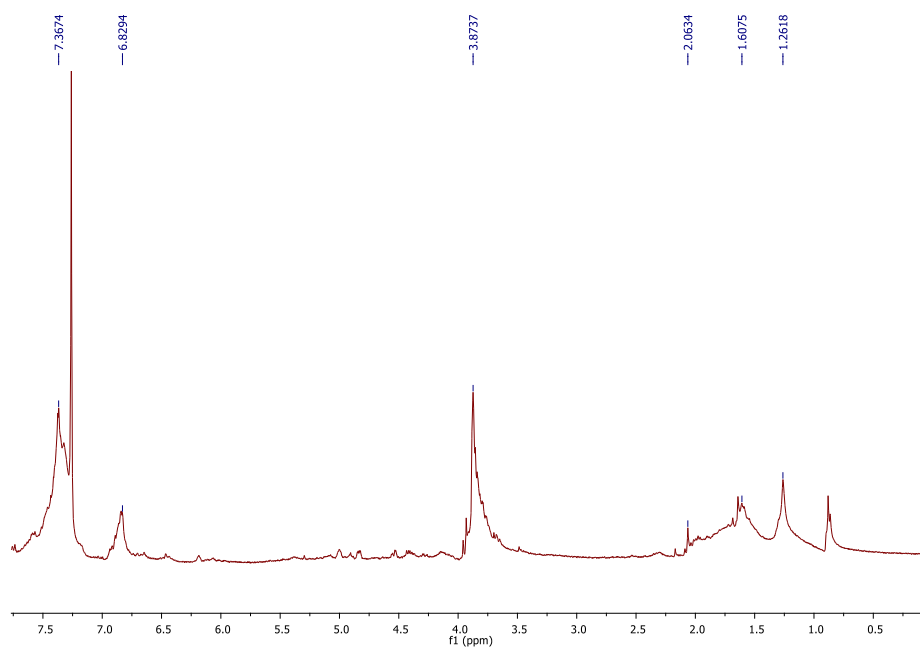

Figure S9 - <sup>1</sup>H (400 MHz, CDCl<sub>3</sub>) of co-oligomer 2b.

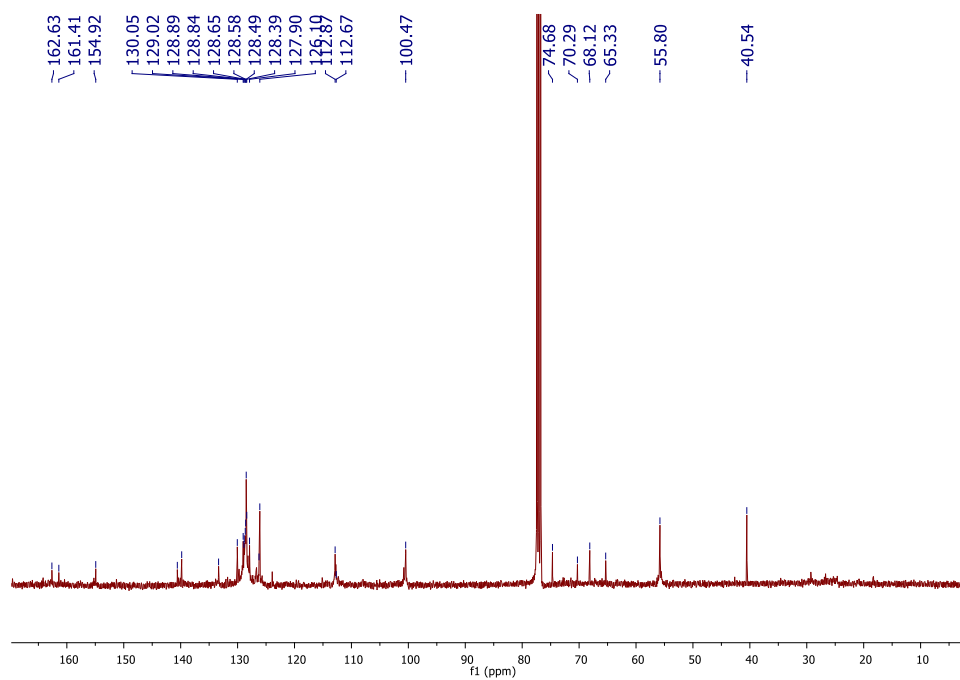

Figure S10 - <sup>13</sup>C (100 MHz, CDCl<sub>3</sub>) of co-oligomer 2b.

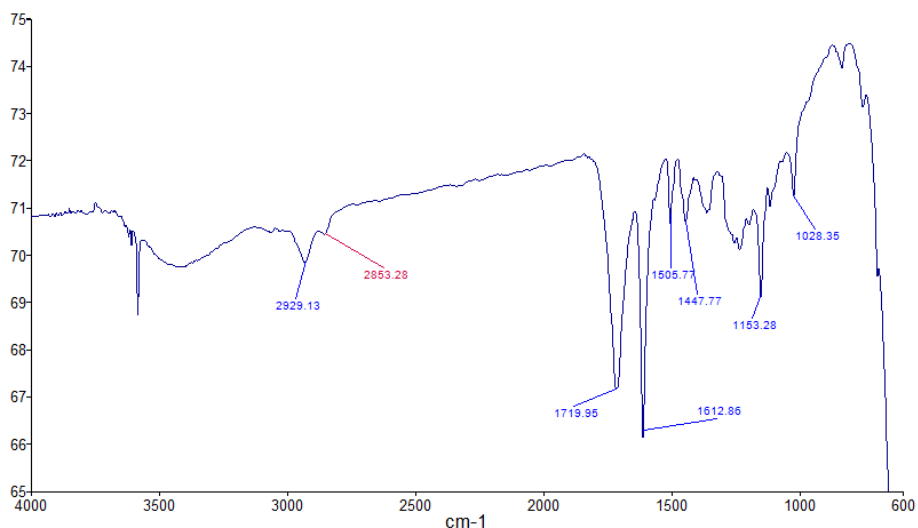

**Figure S11** - FTIR (KBr) of co-oligomer **2b**.

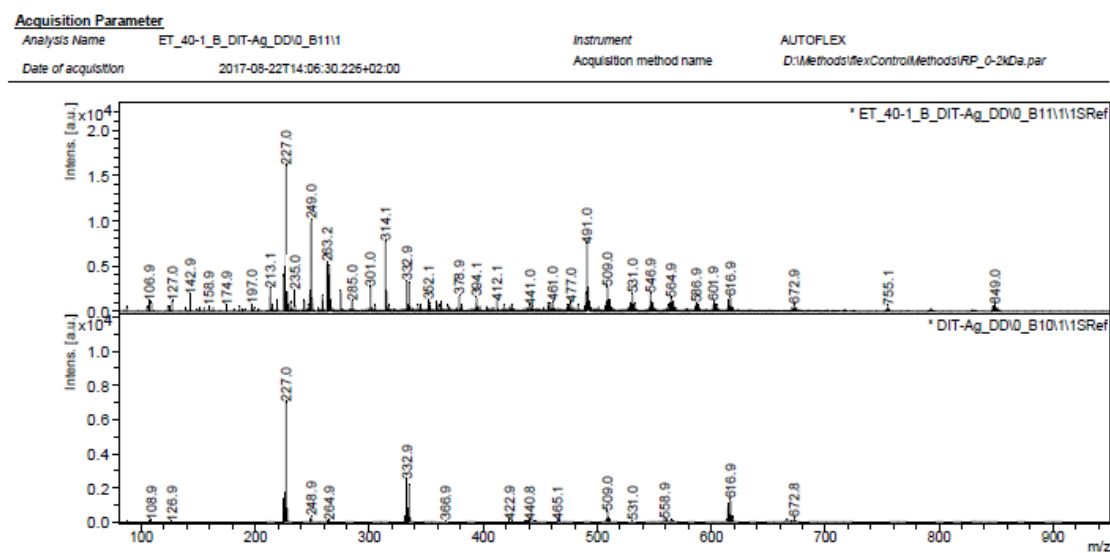

**Figure S12** - MALDI-TOF Mass spectrum (matrix: Dithranol + Ag) of co-oligomer **2b**. Possible constitution of ion  $m/z$  849 can be attributed to five molecules of styrene, one of coumarin **2**, a terminal isobutyronitrile and sodium chloride.

### Co-oligomer of methyl acrylate with 7-methoxy-3-vinylcoumarin (2a)

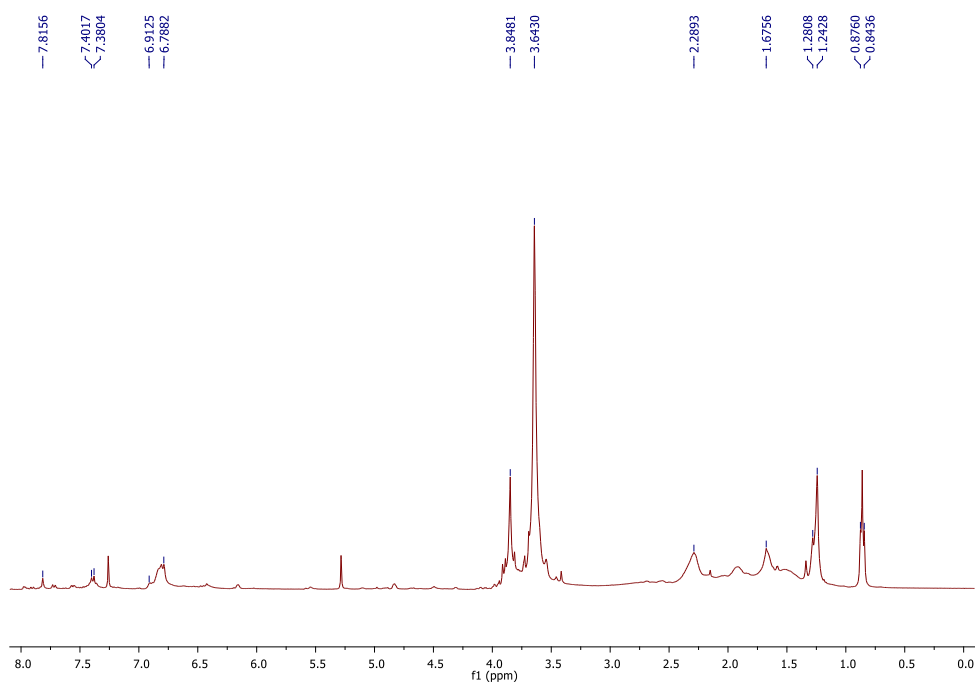

Figure S13 -  $^1\text{H}$  (400 MHz,  $\text{CDCl}_3$ ) of co-oligomer 2a.

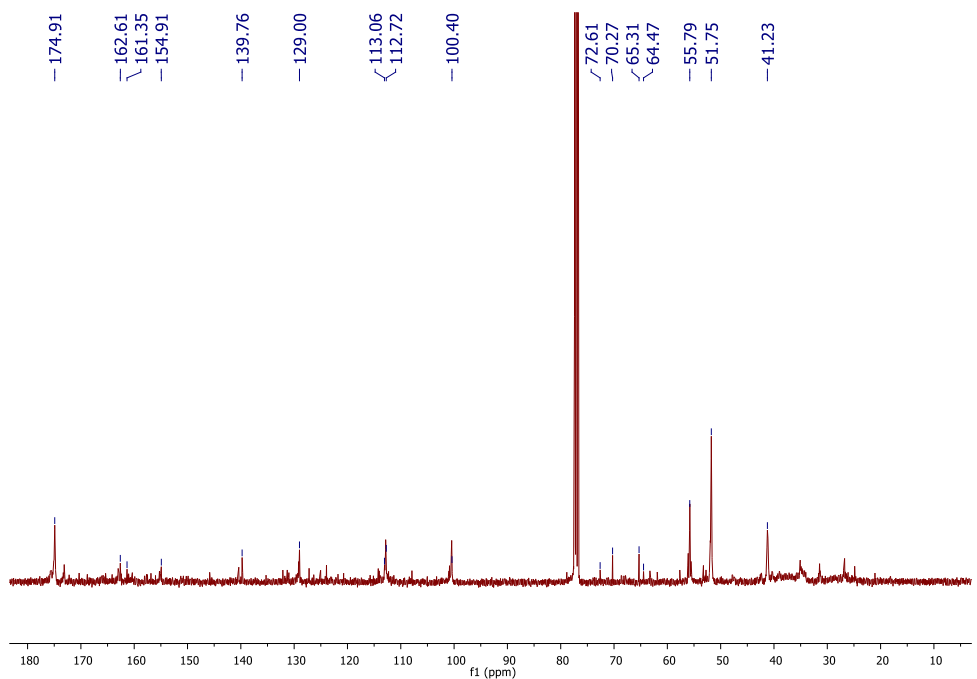

Figure S14 -  $^{13}\text{C}$  (100 MHz,  $\text{CDCl}_3$ ) of co-oligomer 2a.



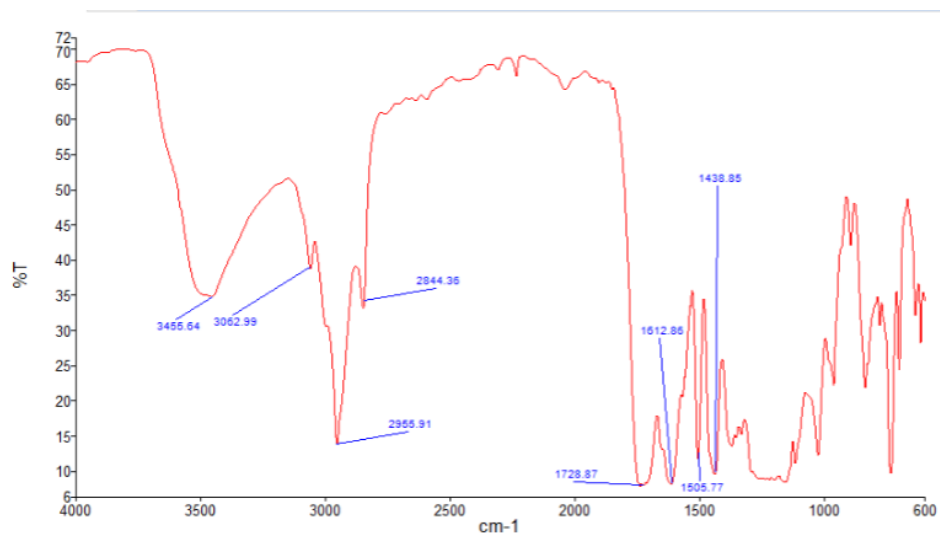

**Figure S15** - FTIR (KBr) of co-oligomer **2a**.

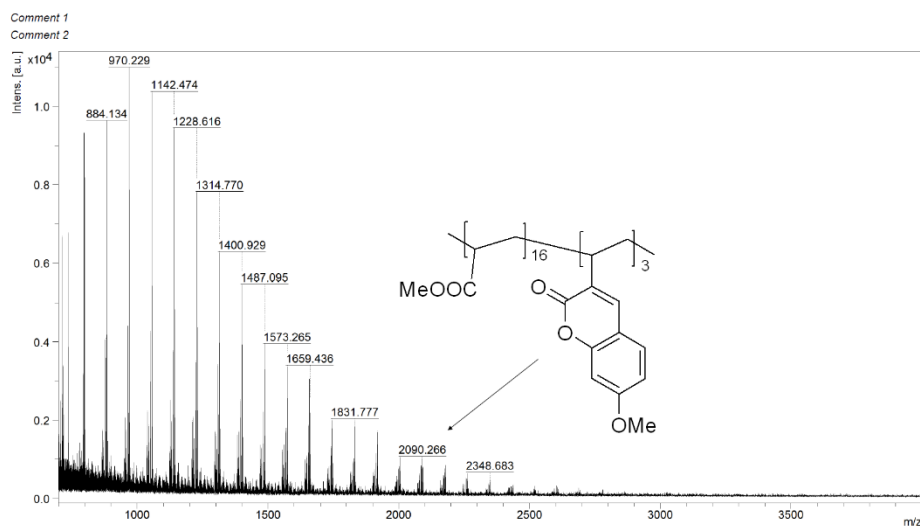

**Figure S16** - Mass spectrum MALDI-TOF (DHB matrix) of co-oligomer **2a**. Possible constitution of ion  $m/z$  2090 can be attributed to sixteen molecules of methyl acrylate, three of coumarin **2**, a terminal isobutyronitrile and a potassium ion.

Co-oligomer of methyl acrylate with 7-hydroxy-3-vinylcoumarin (**3a**)

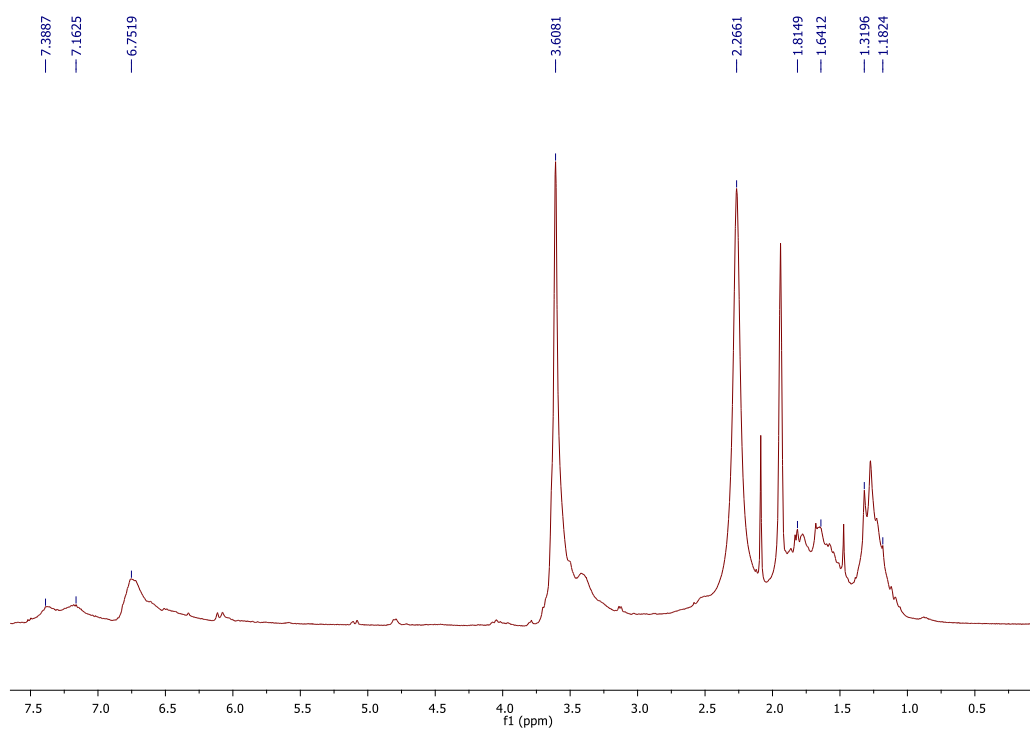

Figure S17 -  $^1\text{H}$  (400 MHz,  $\text{CD}_3\text{CN}$ ) of co-oligomer **3a**.

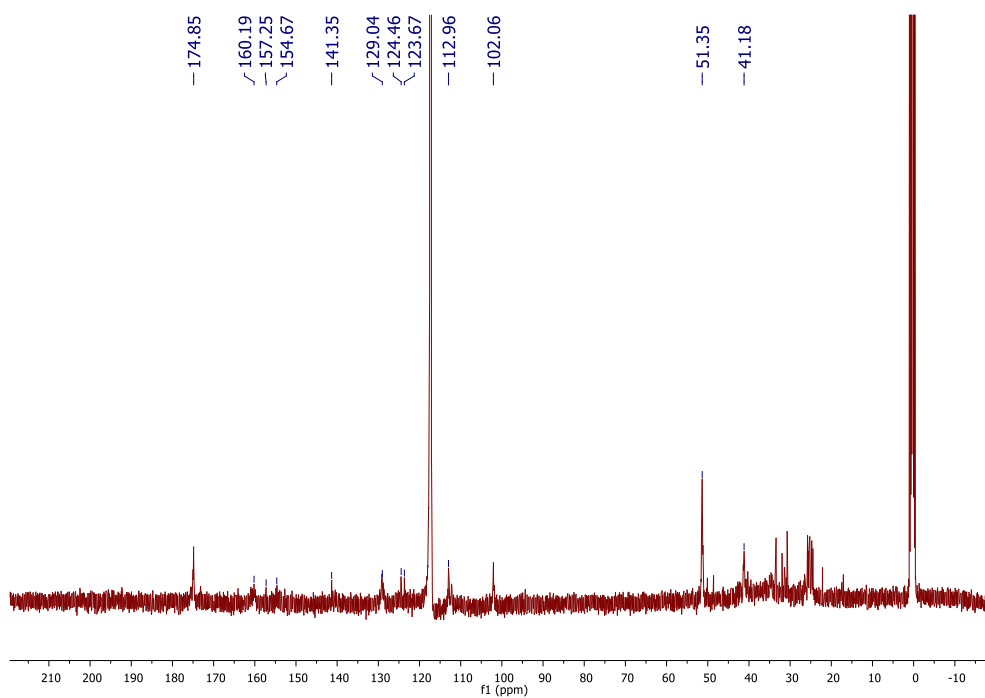

Figure S18 -  $^{13}\text{C}$  (100 MHz,  $\text{CD}_3\text{CN}$ ) of co-oligomer **3a**.

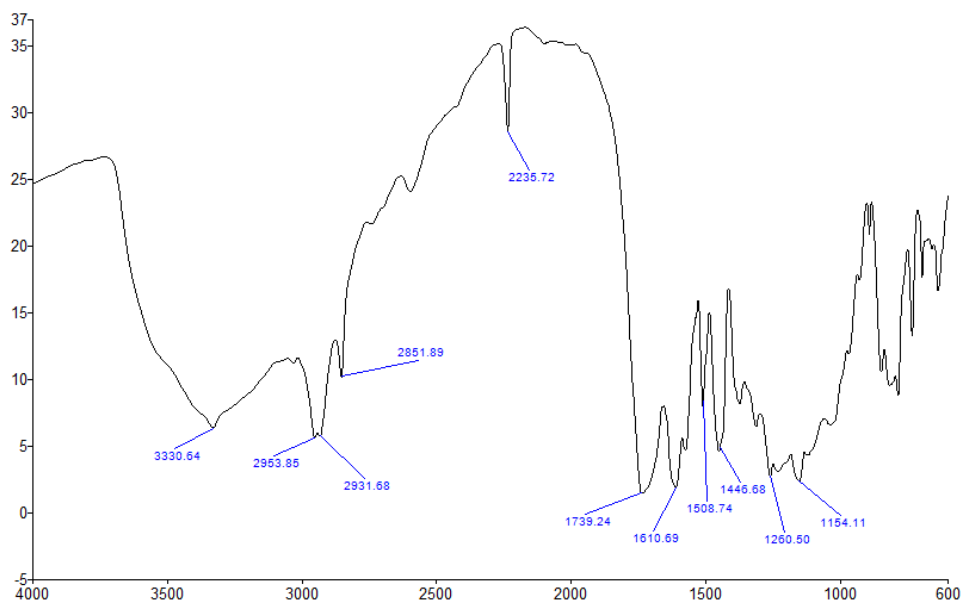

**Figure S19** - FTIR (KBr) of co-oligomer **3a**.

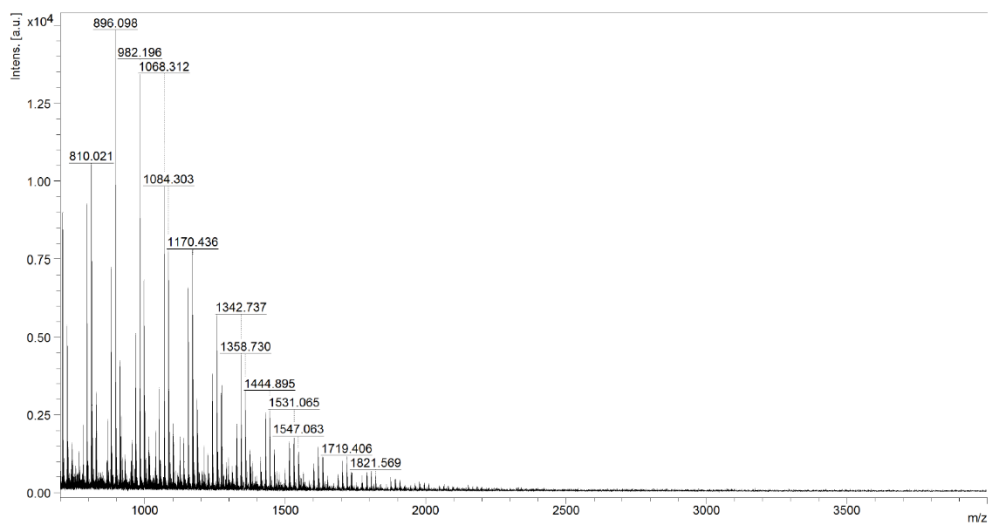

**Figure S20** - Mass spectrum MALDI-TOF (DCTB matrix) of co-oligomer **3a**. Possible constitution of ion  $m/z$  1531 can be attributed to ten molecules of methyl acrylate, two of coumarin **3**, a terminal isobutyronitrile and a potassium ion.

### Co-oligomer of methyl acrylate with 3-vinylcoumarin (**1a**)

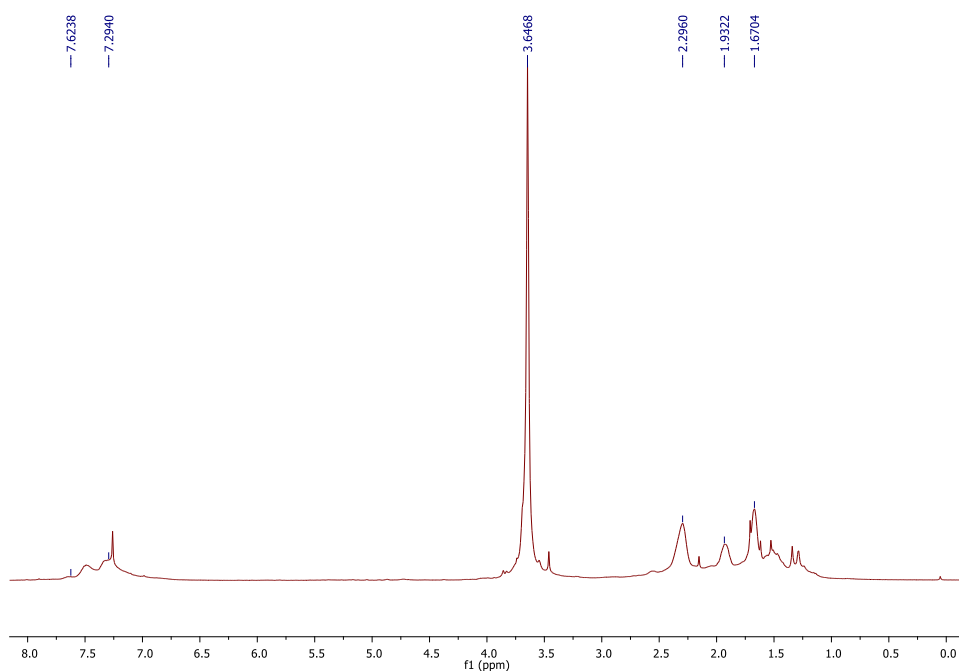

Figure S21 - <sup>1</sup>H (400 MHz, CDCl<sub>3</sub>) of co-oligomer **1a**.

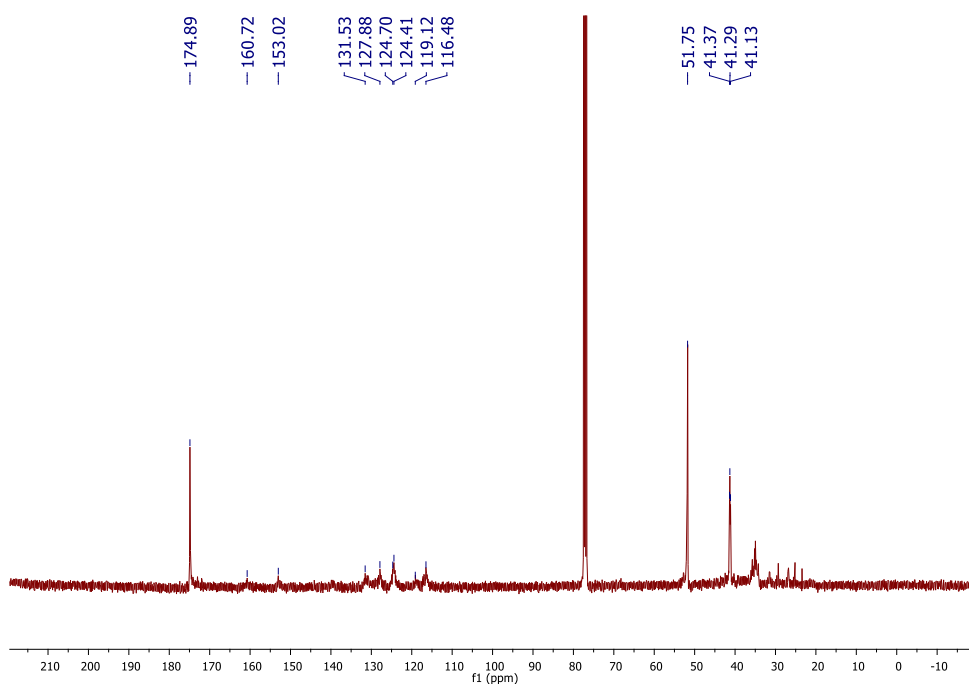

Figure S22 - <sup>13</sup>C (100 MHz, CDCl<sub>3</sub>) of co-oligomer **1a**.

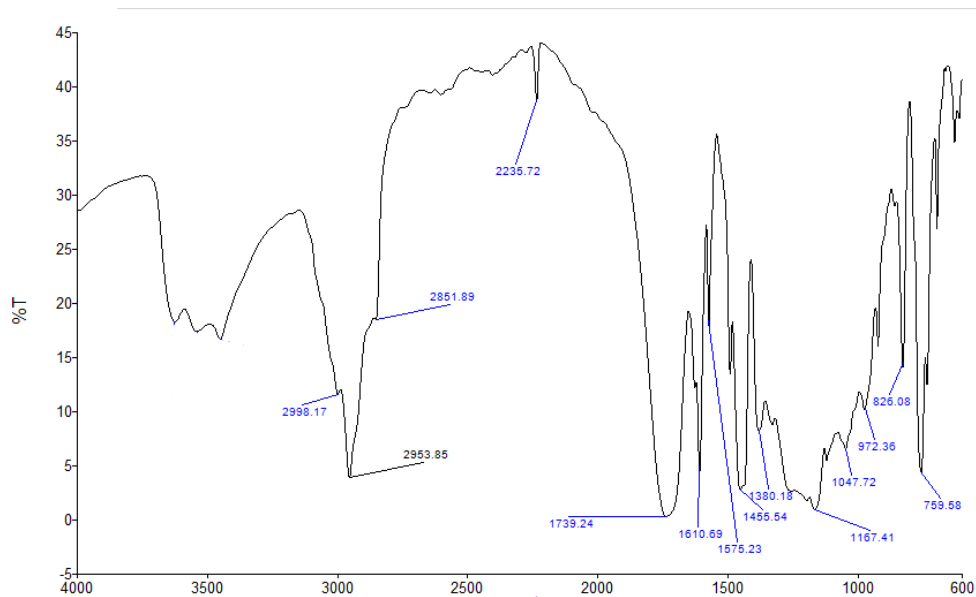

**Figure S23 - FTIR (NaCl) of co-oligomer 1a.**

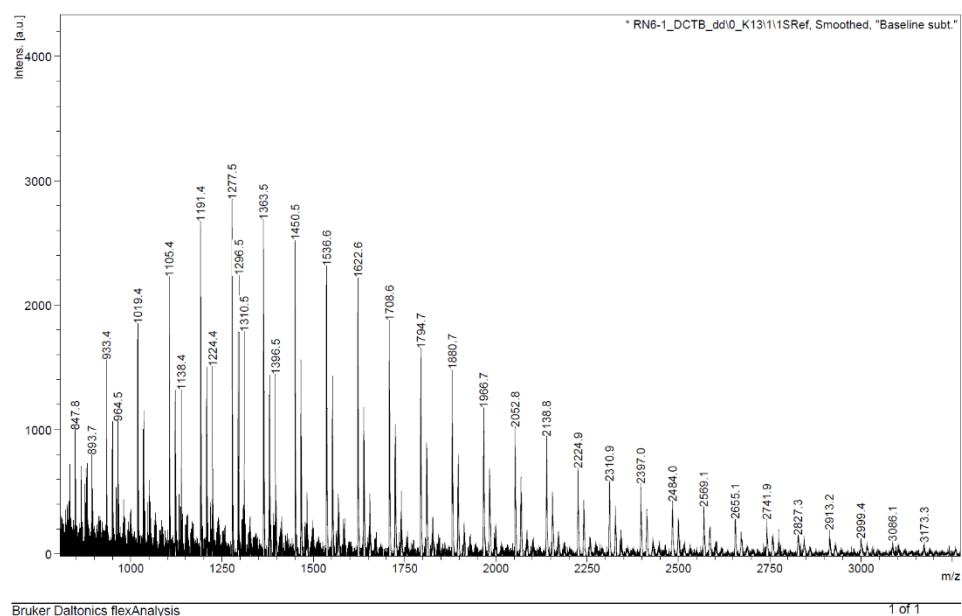

**Figure S24 - Mass spectrum MALDI-TOF (DCTB matrix) of co-oligomer 1a.**
